1 **Lack of signal for the impact of venom gene diversity on speciation**  
2 **rates in cone snails**

3

4 Mark A Phuong<sup>1</sup>, Michael E Alfaro<sup>1</sup>, Gusti N Mahardika<sup>2</sup>, Ristiyanti M Marwoto<sup>3</sup>, Romanus  
5 Edy Prabowo<sup>4</sup>, Thomas von Rintelen<sup>5</sup>, Philipp WH Vogt<sup>5</sup>, Jonathan R Hendricks<sup>6</sup>, Nicolas  
6 Puillandre<sup>7</sup>

7

8 <sup>1</sup>Department of Ecology and Evolutionary Biology, University of California, Los Angeles, CA  
9 90095, USA

10 <sup>2</sup>Animal Biomedical and Molecular Biology Laboratory, Faculty of Veterinary Medicine,  
11 Udayana University Bali, Jl Seseetan-Markisa 6, Denpasar, Bali 80225, Indonesia

12 <sup>3</sup>Zoology Division (Museum Zoologicum Bogoriense), Research Center for Biology, LIPI,  
13 Cibinong, Bogor, Indonesia

14 <sup>4</sup>Faculty of Biology, Jenderal Soedirman University, Purwokerto, Indonesia

15 <sup>5</sup>Museum für Naturkunde - Leibniz Institute for Evolution and Biodiversity Science, Berlin,  
16 Germany

17 <sup>6</sup>Paleontological Research Institution, Ithica, NY 14850, USA

18 <sup>7</sup>Institut Systématique Evolution Biodiversité (ISYEB), Muséum national d'Histoire naturelle,  
19 CNRS, Sorbonne Université, EPHE, 57 rue Cuvier, CP 26, 75005 Paris, France

20

21 **Corresponding author:**

22 M. A. Phuong

23 E-mail: [markphuong@gmail.com](mailto:markphuong@gmail.com)

24

## 25 **Abstract**

26 Understanding why some groups of organisms are more diverse than others is a central goal in  
27 macroevolution. Evolvability, or lineages' intrinsic capacity for evolutionary change, is thought  
28 to influence disparities in species diversity across taxa. Over macroevolutionary time scales,  
29 clades that exhibit high evolvability are expected to have higher speciation rates. Cone snails  
30 (family: Conidae, >900 spp.) provide a unique opportunity to test this prediction because their  
31 venom genes can be used to characterize differences in evolvability between clades. Cone snails  
32 are carnivorous, use prey-specific venom (conotoxins) to capture prey, and the genes that encode  
33 venom are known and diversify through gene duplication. Theory predicts that higher gene  
34 diversity confers a greater potential to generate novel phenotypes for specialization and  
35 adaptation. Therefore, if conotoxin gene diversity gives rise to varying levels of evolvability,  
36 conotoxin gene diversity should be coupled with macroevolutionary speciation rates. We applied  
37 exon capture techniques to recover phylogenetic markers and conotoxin loci across 314 species,  
38 the largest venom discovery effort in a single study. We paired a reconstructed timetree using 12  
39 fossil calibrations with species-specific estimates of conotoxin gene diversity and used trait-  
40 dependent diversification methods to test the impact of evolvability on diversification patterns.  
41 Surprisingly, did not detect any signal for the relationship between conotoxin gene diversity and  
42 speciation rates, suggesting that venom evolution may not be the rate-limiting factor controlling  
43 diversification dynamics in Conidae. Comparative analyses showed some signal for the impact  
44 of diet and larval dispersal strategy on diversification patterns, though whether or not we  
45 detected a signal depended on the dataset and the method. If our results remain true with  
46 increased sampling in future studies, they suggest that the rapid evolution of Conidae venom

47 may cause other factors to become more critical to diversification, such as ecological opportunity  
48 or traits that promote isolation among lineages.

49

## 50 **Introduction**

51 Why are some taxa more diverse than others? Species richness and phenotypic diversity are not  
52 distributed evenly across the tree of life (Rabosky *et al.* 2013). For example, there exists over  
53 10,000 species of birds, but their closest relatives (crocodiles and alligators) comprise only of 23  
54 species. Differences in evolvability, or lineages' intrinsic capacity to adapt and diversify, is one  
55 reason commonly used to explain these disparities (Wagner & Altenberg 1996; Yang 2001;  
56 Jones *et al.* 2007; Pigliucci 2008; Losos 2010). Evolvability is thought to be determined by the  
57 underlying genetic architecture of organisms – some genomes of organisms have a greater  
58 propensity to generate variation that may be adaptive in the future (Wagner & Altenberg 1996;  
59 Jones *et al.* 2007; Pigliucci 2008). For example, gene duplication increases evolvability – the  
60 copied gene is free from the selective pressures of the original gene (Crow & Wagner 2006).  
61 Mutation, selection, and drift can act on the copied gene, facilitating the possibility of new  
62 phenotypes to arise; this shapes the extent that taxa can diversify and exploit resources (Crow &  
63 Wagner 2006). Over long evolutionary time scales, clades that exhibit higher evolvability are  
64 predicted to have increased species richness and diversification rates (Yang 2001).

65 Despite the ubiquity of this concept in macroevolutionary theory, few studies explicitly  
66 test these predictions; this is possibly due to the difficulty of identifying genes responsible for  
67 phenotype (Hoekstra & Coyne 2007). Past studies that have attempted to test the impact of  
68 evolvability on diversification have produced mixed results (Santini *et al.* 2009; Soltis *et al.*  
69 2009; Mayrose *et al.* 2011; Rabosky *et al.* 2013; Zhan *et al.* 2014; Tank *et al.* 2015; Malmstrøm

70 *et al.* 2016). For example, whole genome duplication events, which are hypothesized to increase  
71 the genomic potential of organisms, have been documented to increase (Santini *et al.* 2009;  
72 Soltis *et al.* 2009; Tank *et al.* 2015), decrease (Mayrose *et al.* 2011), and have no impact (Zhan *et*  
73 *al.* 2014) on the long-term evolutionary success of clades. In another case, a positive correlation  
74 between evolvability and speciation rates exist when measuring evolvability through  
75 morphological proxies (Rabosky *et al.* 2013). One limitation of past research on this hypothesis  
76 is the inability to tie genomic changes with ecological factors driving diversification patterns  
77 (Robertson *et al.* 2017). Although gene duplication and whole genome duplication events can  
78 increase the evolutionary capacity of organisms, genes that are ecologically relevant for  
79 adaptation may not be readily available for selection to drive divergence.

80         Here, we study the relationship between evolvability and diversification in cone snails  
81 (family, Conidae), a diverse group (> 900 spp.) of predatory marine gastropods. These snails  
82 feed on either worms, molluscs, or fish by paralyzing their prey with a cocktail of venomous  
83 neurotoxins (conotoxins, Duda & Palumbi 1999). Cone snail provides a unique opportunity to  
84 test predictions of evolvability and diversification for the following reasons: first, cone snail  
85 species share an ecologically relevant trait, venom. Conidae species are globally distributed in  
86 tropical and subtropical regions, where >30 species can co-occur within the same habitat (Kohn  
87 2001). High numbers of species hypothesized to be able to co-occur because species have  
88 diversified to specialize on different prey using prey-specific conotoxins (Duda & Palumbi  
89 1999). Second, venom genes are known and diversify through gene duplication (Duda &  
90 Palumbi 2000; Kaas *et al.* 2010, 2012; Chang & Duda 2012). Diet specialization is thought to be  
91 enabled by the rapid evolution of the genes that underlie conotoxins – estimated rates of gene  
92 duplication and nonsynonymous substitutions rates for conotoxin genes are the highest across

93 metazoans (Duda & Palumbi 2000; Chang & Duda 2012). Therefore, conotoxin genes provide a  
94 natural way to characterize differences in evolvability between clades.

95 We employ a sequence capture technique previously used in cone snails (Phuong &  
96 Mahardika 2017) to recover phylogenetic markers and conotoxin genes from 314 described  
97 species. We use the phylogenetic markers to reconstruct a time-calibrated phylogeny and  
98 perform trait-dependent diversification analyses to test the impact of evolvability on  
99 diversification patterns. We predict that clades with a greater number of conotoxin gene copies  
100 should have higher speciation rates. In addition, we test other traits that may have an impact on  
101 diversification patterns, including diet and larval dispersal strategy.

102

## 103 **Methods**

104

### 105 *Bait design*

106 We used a targeted sequencing approach to recover markers for phylogenetic inference and  
107 obtain an estimate of conotoxin gene diversity from Conidae species. For the phylogenetic  
108 markers, we identified loci using a previous Conidae targeted sequencing dataset (Phuong &  
109 Mahardika 2017) and the Conidae transcriptome data from (Phuong *et al.* 2016). In the Conidae  
110 targeted sequencing dataset, the authors generated a phylogeny using 5883 loci across 32 species  
111 (Phuong & Mahardika 2017). For our sequencing experiment, we only retained loci that were  
112 >180bp and were present in at least 26 out of 32 taxa with at least 10X coverage. We chose to  
113 only include longer loci to increase confidence in identifying orthologous fragments in other  
114 Conidae species. To identify additional phylogenetic markers from the transcriptome data

115 (Phuong *et al.* 2016), which consisted of venom duct transcriptomes from 12 species, we  
116 performed the following:

- 117 (1) identified reciprocal best blast hits between the assembled transcriptome and the  
118 *Lottia gigantea* protein reference (Simakov *et al.* 2013) using BLAST+ v2.2.31 (evalue =  
119 1e-10). We also considered fragments that had their best hit to the protein reference, but  
120 to a non-overlapping portion (<20% overlapping).
- 121 (2) mapped reads using bowtie2 v2.2.7 (Langmead & Salzberg 2012)
- 122 (3) removed duplicates using picard-tools v.2.1.1 (<http://broadinstitute.github.io/picard>)
- 123 (4) fixed assembly errors by calling single nucleotide polymorphisms (SNPs) using  
124 samtools v1.3 and bcftools v1.3 (Li *et al.* 2009)
- 125 (5) aligned sequences per locus using mafft v7.222 (Katoh *et al.* 2005)
- 126 (6) calculated uncorrected pairwise distances within each locus for all possible pairwise  
127 comparisons
- 128 (7) removed sequences if the uncorrected pairwise distance was greater than the 90<sup>th</sup>  
129 percentile for those pair of species
- 130 (8) denoted exon boundaries by comparing the transcriptome sequences to the *Lottia*  
131 *gigantea* genome reference (Simakov *et al.* 2013), retaining exons >180bp

132 For all retained phylogenetic markers, we also performed the following: (1) we generated an  
133 ancestral sequence using FastML v3.1 (Ashkenazy *et al.* 2012) between a *Californiconus*  
134 *californicus* sequence and another Conidae sequence that had the highest amount of overlap with  
135 the *C. californicus* sequence (we generated these ancestral sequences to decrease the genetic  
136 distances between the target sequence and the orthologous sequence from any Conidae species),  
137 (2) removed sequences that had a GC content < 30% or > 70% because extreme GC contents can

138 reduce capture efficiency (Bi *et al.* 2012), (3) removed loci that contained repeats identified  
139 through the RepeatMasker v4.0.6 web server (Smit *et al.* 2015), and (4) performed a self-blast  
140 with the target sequences via blastn v2.2.31 (evaluate = 1e-10) and removed loci that did not blast  
141 to itself with sequence identity >90%. The final set of target loci for phylogenetic inference  
142 included 1749 loci, with a total length of 470,435 bp.

143 To recover conotoxin loci, we targeted sequences generated from both the previous  
144 targeted sequencing dataset (Phuong & Mahardika 2017) and the transcriptome dataset (Phuong  
145 *et al.* 2016). For conotoxin sequences discovered from the targeted sequencing dataset (Phuong  
146 & Mahardika 2017), we performed the following to generate our target sequences: (1) we  
147 trimmed each sequence to only retain the coding region and included 100bp flanking the exon,  
148 (2) merged sequences using cd-hit v4.6.4 (Li & Godzik 2006) at 95% sequence similarity to  
149 reduce redundancy among conotoxin loci (3) masked repeats using the RepeatMasker v4.0.6 web  
150 server (Smit *et al.* 2015), and (4) retained loci >120bp to ensure that the locus was longer than  
151 our desired bait sequence length. We concatenated all sequences below 120bp to create a single,  
152 chimeric sequence for capture. The final set of target sequences from the previous targeted  
153 sequencing dataset consisted of 12,652 unique loci totaling 3,113,904 bp and a single  
154 concatenated sequence representing 351 merged loci with a total length of 37,936 bp. We also  
155 targeted conotoxin loci from the transcriptomes described in (Phuong *et al.* 2016) to obtain  
156 conotoxin loci from gene superfamilies that were not targeted in (Phuong & Mahardika 2017) or  
157 performed poorly. We performed the following to generate a set of conotoxin loci from the  
158 transcriptome data: (1) we trimmed sequences from (Phuong *et al.* 2016) to only include the  
159 coding region and 100bp of the untranslated regions (UTRs), (2) merged sequences using cd-hit  
160 v4.6.4 (Li & Godzik 2006) at 97% sequence similarity to reduce redundancy among conotoxin

161 loci, and (3) masked repeats using the RepeatMasker v4.0.6 web server (Smit *et al.* 2015). This  
162 filtered dataset contained 395 conotoxin loci with a total length of 171,317 bp.

163 We submitted the following datasets to MYcroarray (Ann Arbor, Michigan, USA) for  
164 bait synthesis: (1) 1749 loci for phylogenetic inference, (2) 12652 conotoxin loci using data from  
165 (Phuong & Mahardika 2017), (3) a single concatenated sequence using data from (Phuong &  
166 Mahardika 2017), and (4) 395 additional conotoxin loci using transcriptome data from (Phuong  
167 *et al.* 2016). We chose to synthesize a MYbaits-3 kit, which included 60,000 bait sequences to  
168 accommodate all the targeted loci. Because our aim was to recover sequences from species  
169 throughout Conidae, each bait sequence was 120bp in length, which increases the efficiency of  
170 recovering divergent fragments. We used a 2X tiling density strategy (a new probe every 60bp)  
171 across the sequences from datasets (1) and (2) and used a 4X tiling density strategy (a new probe  
172 every 30bp) across datasets (3) and (4). We chose to increase the tiling density for datasets (3)  
173 and (4) because the boundaries between exons were not denoted and we wanted to ensure  
174 effective capture of the conotoxin loci. The set of probe sequences will be made available on  
175 DRYAD following publication.

176

### 177 *Genetic samples, library preparation, hybridization, and sequencing*

178 We performed the targeted sequencing experiment across 362 samples representing both  
179 described Conidae species and unique lineages/potential new species identified during routine  
180 species verification using the mitochondrial locus (results not shown), CO1 (Table S1, Folmer *et al.*  
181 *al.* 1994). We also sequenced *Bathyoma* sp. as an outgroup based on a recent molecular  
182 phylogeny of the Conoideans, a clade of gastropods that includes Conidae (Table S1, Puillandre  
183 *et al.* 2011). We obtained these genetic samples from two field expeditions in Indonesia and



184 Australia and from five museum collections (Table S1). We extracted DNA from tissue using the  
185 EZNA Mollusc DNA kit (Omega Bio-Tek, Doraville, GA, USA). There was slight variation in  
186 tissue preservation strategy among samples, with most tissues preserved directly in 95% ethanol  
187 (Table S1). For 10 samples, tissue was not available but DNA was available from a previous  
188 extraction. For these samples, we ran the DNA through the EZNA Mollusc DNA kit to purify the  
189 DNA prior to library preparation. We extracted a minimum of 2000 ng per sample prior to  
190 library preparation, when possible. We sheared DNA using a Biorupter UCD-200 (Diagenode)  
191 when necessary and used a 1X bead purification protocol to ensure that the DNA fragments per  
192 sample ranged from 250-600bp, centered on ~350bp. We aimed to generate libraries with longer  
193 fragment sizes to ensure that we could recover exons containing the mature toxin region, which  
194 are often only recoverable because they are flanking conserved regions that are targeted by our  
195 bait design (Phuong & Mahardika 2017).

196 We prepared libraries for following the (Meyer & Kircher 2010) protocol with the  
197 following modifications: (1) we started library preparation with at least 2000ng, rather than the  
198 500ng suggested by the protocol to increase downstream capture efficiency, (2) we performed  
199 1X bead clean-up for all enzymatic reactions and (3) generated dual-indexed libraries by  
200 incorporating adapters with unique 7bp barcodes. We were able to re-use libraries for the 32  
201 species sequenced in (Phuong & Mahardika 2017) and incorporated new indexes for these  
202 samples.

203 We generated equimolar pools of 8 samples and hybridized probes with 2000ng of the  
204 pooled DNA for ~24 hours. We substituted the adapter blocking oligonucleotides provided by  
205 MYcroarray with custom xGen blocking oligonucleotides (Integrated DNA technologies). We  
206 performed 3 independent post-capture amplifications using 12 PCR cycles and pooled these

207 products. We sequenced all samples across 5 Illumina HiSeq 4000 lanes with 100bp paired-end  
208 reads. We multiplexed 80 samples per lane for the first 4 lanes and multiplexed the remaining 43  
209 samples on the last lane. Sequencing was carried out at the Vincent J. Coates Genomics  
210 Sequencing Laboratory at UC Berkeley. We note that our third lane containing 80 samples was  
211 contaminated, with 65% of the reads belonging to corn DNA. We were able to resequence this  
212 entire lane, resulting in overall increased sequencing effort for samples belonging to our third  
213 lane (Table 1).

214

#### 215 *Data filtration and initial assembly*

216 We filtered the raw read data as follows:

217 (1) we trimmed reads using Trimmomatic v0.36 under the following conditions: (a) we  
218 used the ILLUMINACLIP option to trim adapters with a seed mismatch threshold of 2, a  
219 palindrome clip threshold of 40, and a simple clip threshold of 15, (b) we performed  
220 quality trimming used the SLIDINGWINDOW option with a window size of 4 and a  
221 quality threshold of 20, (c) we removed reads below 36bp by setting the MINLEN option  
222 to 36, and (d) we removed leading and trailing bases under a quality threshold of 15.

223 (2) we merged reads using FLASH v1.2.11 (Magoč & Salzberg 2011) with a min overlap  
224 parameter of 5, a max overlap parameter of 100, and a mismatch ratio of 0.05.

225 (3) we removed low complexity reads using prinseq v0.20.4 (Schmieder & Edwards  
226 2011) using the entropy method with a conservative threshold of 60.

227 We assembled the filtered read data using SPAdes v3.8.1 using default parameters and reduced  
228 redundancy in the resultant assemblies with cap3 (Huang & Madan 1999) under default  
229 parameters and cd-hit v4.6 (Li & Godzik 2006, sequence identity threshold = 99%).

230

231 *Phylogenetic data processing and filtering*

232       To associate assembled contigs with the target sequences for phylogenetic inference, we  
233 used blastn v2.2.31 (word size = 11, evalue = 1e-10). For the set of target sequences that  
234 originated from the transcriptome dataset, we redefined exon/intron boundaries using  
235 EXONERATE v2.2.0 (Slater & Birney 2005) using the est2genome model because we found  
236 that several predicted exons actually consisted of several smaller exons. For each sample, we  
237 mapped reads using bowtie2 (very sensitive local and no discordant options enabled) to a  
238 reference that contained only sequences associated with the targeted phylogenetic markers. We  
239 marked duplicates using picard-tools v2.0.1 and masked all regions below 4X coverage and  
240 removed the entire sequence if more than 30% of the sequence was below 4X coverage. We  
241 called SNPs using samtools v1.3 and bcftools v1.3 and estimated average heterozygosity across  
242 all contigs within a sample. We removed sequences if a contig had a heterozygosity value greater  
243 than two standard deviations away from the mean.

244

245 *Conotoxin assembly, processing, and filtering*

246       Commonly used assembly programs are known to poorly reconstruct all copies of  
247 multilocus gene families (Lavergne *et al.* 2015; Phuong *et al.* 2016). To address this issue, we  
248 followed the conotoxin assembly workflow outlined in (Phuong & Mahardika 2017). Briefly, we  
249 first mapped reads back to our assembled contigs using the ‘very sensitive local’ and no  
250 discordant’ options. Then, we identified conotoxins within our dataset by using blastn v2.2.31  
251 (word size = 11, evalue = 1e-10) to associate our assembled contigs (from SPAdes) with  
252 conotoxins we targeted in the bait design. We generated a set of unique conotoxin ‘seed

253 sequences' (a short stretch [ $\sim$ 100bp] of conotoxin-blasted sequence) using a combination of of  
254 the pysam module (<https://github.com/pysam-developers/pysam>), cd-hit v4.6 (percent identity =  
255 98%), cap3 (overlap percent identity cutoff = 99%), blastn v2.2.31 (word size = 11, evalue=1e-  
256 10), and Tandem Repeats Finder v4.09 (Benson 1999, minscore = 12, maxperiod = 2). We  
257 mapped reads to these seed sequences using bowtie2 v2.2.6 (very sensitive local and no  
258 discordant options enabled) and built out the conotoxin sequences using the PRICE v1.2  
259 algorithm, which uses an iterative mapping and extension strategy to build out contigs from  
260 initial seed sequences (Ruby *et al.* 2013). We ran price on each seed sequence at 5 minimum  
261 percentage identity (MPI) values (90%, 92%, 94%, 96%, 98%) with a minimum overlap length  
262 value of 40 and a threshold value of 20 for scaling overlap for contig-edge assemblies. A  
263 reassembled sequence was retained if it shared 90% identity with the original seed sequence and  
264 we reduced redundancy by only retaining the longest sequence per seed sequence out of the 5  
265 MPI assembly iterations. This approach is described in further detail in (Phuong & Mahardika  
266 2017). We note that the final conotoxin sequences per sample consisted of exon fragments,  
267 where each sequence represents a single conotoxin exon flanked by any adjacent noncoding  
268 region.

269 We updated our conotoxin reference database because we targeted additional conotoxin  
270 transcripts from (Phuong *et al.* 2016). We used blastn v2.2.31 (word size = 11, evalue =1e-10)  
271 and EXONERATE v2.2.0 to define exon/intron boundaries for these additional conotoxin  
272 transcripts and added them to our conotoxin reference database. The final conotoxin reference  
273 database consisted of conotoxin sequences with the coding regions denoted and gene superfamily  
274 annotated. We also annotated the conotoxin sequences for functional region (e.g., signal, pre,

275 mature, post) using blastn v2.2.31 (word size = 11, evaluate = 1e-10) with a conotoxin reference  
276 database that was previously categorized by functional region (Phuong & Mahardika 2017).

277         With the final conotoxin reference database, we performed blastn v2.2.31 (word size =  
278 11, evaluate = 1e-10) searches between the conotoxin reference and every sample's re-assembled  
279 conotoxin sequences. We retained sequences if they could align across the entire coding region  
280 of the reference sequence. We guessed the coding region for each retained sequence by aligning  
281 the query sequence with the reference conotoxin using mafft v7.222 and denoting the coding  
282 region as the region of overlap with the exon in the reference conotoxin. We fixed misassemblies  
283 by mapping reads with bowtie2 (very sensitive local and no discordant options enabled, score  
284 min = L, 70, 1) back to each conotoxin assembly and marked duplicates using picard-tools  
285 v2.0.1. We masked regions below 5X coverage and discarded sequences if coverage was below  
286 5X across the entire predicted coding region. To generate the final set of conotoxin sequences  
287 per sample, we merged sequences using cd-hit v4.6.4 (percent identity = 98%, use local sequence  
288 identity, alignment coverage of longer sequence = 10%, alignment coverage of short sequence =  
289 50%).

290

### 291 *Targeted sequencing experiment evaluation*

292         We generated the following statistics to evaluate the overall efficiency of the capture  
293 experiment: (1) we calculated the % reads mapped to our targets by mapping reads to a reference  
294 containing all targets (both phylogenetic markers and conotoxin sequences) using bowtie2 v2.2.7  
295 (very sensitive local and no discordant options enabled, score min = L, 70, 1), (2) we calculated  
296 the % duplicates that were identified through the picard-tools, and (3) we calculated average  
297 coverage across the phylogenetic markers and conotoxin sequences. We also evaluated the effect

298 of tissue quality (measured by the maximum fragment length of the extracted DNA sample via  
299 gel electrophoresis) and genus (only on *Conus*, *Profundiconus*, and *Conasprella*, the three genera  
300 with more than 1 sample included in this study) on these capture efficiency metrics using an  
301 Analysis of Variance (ANOVA). To assess the effectiveness of conotoxin sequence recovery, we  
302 compared our capture results with conotoxin diversity estimates from (Phuong & Mahardika  
303 2017) and calculated the average change in those estimates.

304

### 305 *Phylogenetic inference*

306 In addition to the 362 samples that we sequenced in this study, we obtained sequences for  
307 10 other species (Table 1). For two of these species, we used data from another targeted  
308 sequencing study (Abdelkrim *et al.* unpublished). We used blastn (word size = 11, evalue = 1e-  
309 10) to identify loci that were present in our phylogenetic marker reference. These sequences  
310 were filtered under conditions similar to the filtering strategy applied to the phylogenetic  
311 markers in this study. For the other eight species, we used data from venom duct transcriptomes  
312 (Safavi-Hemami *et al.* unpublished). With these transcriptomes, we trimmed data using  
313 trimmomatic v0.36 and merged reads using flash using parameters previously described above.  
314 We assembled each transcriptome using Trinity v2.1.1 (Grabherr *et al.* 2011) reduced  
315 redundancy in these transcriptomes with cap3 and cd-hit (percent identity = 99%). We used  
316 blastn (word size = 11, evalue=1e-10) to associate contigs with the phylogenetic markers present  
317 in our dataset. We used bowtie2 v2.2.7 (very sensitive local and no discordant enabled), samtools  
318 v1.3, and bcftools 1.3 to map reads and call SNPs. We removed sequences if they were below  
319 4X coverage for > 30% of the sequence and masked bases if they were below 4X coverage. We  
320 also removed sequences if they had a heterozygosity value two standard deviations away from

321 the mean heterozygosity within a sample. We used to mafft v7.222 to align loci across a total of  
322 373 samples.

323 We inferred phylogenies under both maximum likelihood (Stamatakis 2006) and  
324 coalescent-based methods (Mirarab & Warnow 2015). We used RAxML v8.2.9 (Stamatakis  
325 2006) to generate a maximum likelihood phylogeny using a concatenated alignment under a  
326 GTRGAMMA model of sequence evolution and estimated nodal support via bootstrapping. We  
327 generated the coalescent-based phylogeny using ASTRAL-II v5.5.9 (Mirarab & Warnow 2015)  
328 with individual locus trees generated under default parameters in RAxML v8.2.9. We estimated  
329 local posterior probabilities as a measure of branch support (Sayyari & Mirarab 2017). Due to  
330 the underperformance of the capture experiment, we ran both phylogenetic analyses with loci  
331 that had 80% of the taxa, 50% of the taxa, and 20% of the taxa. For each iteration, we removed  
332 taxa that had > 90% missing data.

333

#### 334 *Time calibration*

335 We estimated divergence times using a Bayesian approach with MCMCTree  
336 implemented in PAML v4.9g (Yang 2007). Given the size of our alignments, we first estimated  
337 branch lengths using baseml and then estimated divergence times using Markov chain Monte  
338 Carlo (MCMC). We used a HKY85 +  $\Gamma$  substitution model and used an independent rates clock  
339 model. We left all other settings on default. We performed two independent runs of the analysis  
340 and checked for convergence among the runs. To account for uncertainty in branching order in  
341 our phylogeny, we executed dating analyses across all trees generated from RAxML.

342 For time calibration, we applied a maximum constraint of 55 million years at the root of  
343 Conidae, which corresponds with the first confident appearance of Conidae in the fossil record

344 (Kohn 1990). We assigned 12 additional fossils (Table S2, Fig. S1 (Duda Jr. *et al.* 2001;  
345 Hendricks 2009, 2015, 2018)) to nodes throughout the phylogeny as minimum age constraints,  
346 which MCMCtree treats as soft bounds on the minimum age (Yang 2007). Further information  
347 on fossil placement on nodes can be found in the Supplementary. A recent paper showed that the  
348 number of species in *Lautoconus* may be overestimated (Abalde *et al.* 2017). To account for  
349 potential artificial inflation in the species richness of this clade, we artificially removed half the  
350 unique species in *Lautoconus* from our dataset and ran all dating analyses and downstream  
351 diversification analyses on this secondary dataset.

352

### 353 *Characterizing diversification patterns*

354 To visualize lineage accumulation patterns, we generated a log-lineage through time plot  
355 using the R package APE (Paradis *et al.* 2018). We estimated diversification rates and identified  
356 rate shifts using BAMM (Bayesian Analysis of Macroevolutionary Mixtures) (Rabosky 2014),  
357 which uses reversible jump Markov chain Monte Carlo to explore potential lineage diversification  
358 models. To account for non-randomness in species sampling across Conidae genera, we applied  
359 generic-specific sampling fractions. Using the number of valid Conidae names on WoRMS as  
360 estimates of total species diversity in each genus (Worms Editorial Board 2017), we applied a  
361 sampling fraction of 32.1% to *Profundiconus*, 50% to *Lilliconus*, 100% to *Californiconus*, 16.7%  
362 to *Pygmaeconus*, 28% to *Conasprella*, and 33.7% to *Conus*. We ran BAMM for 100 000 000  
363 generations and assessed convergence by calculating ESS values. We analyzed and visualized  
364 results using the R package BAMMtools (Rabosky *et al.* 2014).

365

### 366 *Trait dependent diversification*



367 We tested for the impact of evolvability (measured as conotoxin gene diversity) on  
368 diversification patterns using two trait dependent diversification methods, focusing on the genus  
369 *Conus*. We focused our hypothesis testing on *Conus* because conotoxin diversity is well-  
370 characterized in this group (Phuong *et al.* 2016) and the sequence capture approach used in this  
371 study likely represents uniform sampling in conotoxin gene diversity across the genus. This is in  
372 contrast to other genera in Conidae, such as *Conasprella* or *Profundiconus*, where low conotoxin  
373 diversity values are likely the result of poor knowledge of the venom repertoire of these genera  
374 (Fig. S2)

375 First, we used BiSSE (binary state speciation and extinction, (Maddison *et al.* 2007))  
376 implemented in the R package diversitree (FitzJohn 2012), which employs a maximum  
377 likelihood approach to estimate the impact of a binary trait on speciation, extinction, and  
378 transition rates between character states. We coded the conotoxin gene diversity data as ‘low’ or  
379 ‘high’ across several thresholds (i.e., 250, 300, 350, 400, 500, 550, or 600 estimated conotoxin  
380 genes per species) and compared BiSSE models where speciation rates were allowed to vary or  
381 remain equal between traits. We applied a sampling fraction of 33.7%, taking the maximum  
382 number of *Conus* species to be the number of valid names on WoRMS (World Register of  
383 Marine Species, (Worms Editorial Board 2017)). We determined the best-fitting model using  
384 Akaike Information Criterion (AIC). Second, we used FiSSE (Fast, intuitive State-dependent  
385 Speciation-Extinction analysis), a non-parametric statistical test that assesses the effects of a  
386 binary character on lineage diversification rates (Rabosky & Goldberg 2017). We followed the  
387 same coding strategy as in the BiSSE analyses to convert conotoxin gene diversity counts to  
388 binary character states. Finally, we used STRAPP (Structured Rate Permutations on Phylogenies,  
389 (Rabosky & Huang 2016) implemented in the R package BAMMtools (Rabosky *et al.* 2014).

390 STRAPP is a semi-parametric approach that tests for trait dependent diversification by  
391 comparing a test statistic with a null distribution generated by permutations of speciation rates  
392 across the tips of the phylogeny (Rabosky & Huang 2016). We generated the empirical  
393 correlation (method = Spearman's rank correlation) between speciation rates and conotoxin gene  
394 diversity and compared this test statistic with the null distribution of correlations generated by  
395 permutations of evolutionary rates across the tree. We performed a two-tailed test with the  
396 alternative hypothesis that there is a correlation between speciation rates and total conotoxin  
397 gene diversity.

398         We also tested the impact of diet and larval dispersal strategy on diversification patterns.  
399 Both piscivory and molluscivory is known to have evolved from the ancestral vermivory  
400 condition in cone snails (Duda Jr. *et al.* 2001) and these diet transitions may be associated with  
401 increased diversification rates due to access to new dietary niches. In addition, differing larval  
402 dispersal strategies including long-lived larval stages (planktotrophy) and short-lived and/or  
403 direct developing larvae (lecithotrophy) are hypothesized to impact long term diversification  
404 patterns (Jablonski 1986). We coded diet as either vermivory, molluscivory, and piscivory using  
405 natural history information from (Jiménez-Tenorio & Tucker 2013). We tested the impact of  
406 speciation and extinction using MuSSE (multistate speciation and extinction, (FitzJohn 2012))  
407 where speciation rates were allowed to vary or remained equal among traits. We excluded  
408 species that were documented to feed on multiple diet types from this analysis. For larval type,  
409 we used protoconch morphology from (Jiménez-Tenorio & Tucker 2013) to infer larval dispersal  
410 strategy, where multispiral protoconchs were indicative of planktotrophic larvae. We tested the  
411 impact of larval type on diversification patterns using BiSSE and FiSSE.

412

## 413 **Results**

414

### 415 *Targeted sequencing data*

416 We sequenced an average of 9,548,342 reads (range: 1,693,918 – 29,888,444) across the  
417 363 samples (Table S1). After redefining exon/intron boundaries in the phylogenetic marker  
418 reference, we ultimately targeted 2210 loci. On average, we recovered 1388 of these loci per  
419 sample (range: 30 – 1849, Table S1) at an average coverage of 12.39X (range: 3.08X – 27.87X,  
420 Table S1). For the conotoxin dataset, each sequence we re-assembled contained a single  
421 conotoxin exon with any associated noncoding regions (referred to here as ‘conotoxin  
422 fragments’). We recovered on average 3416 conotoxin fragments per sample (range: 74 – 11535  
423 fragments, Table S1) at an average coverage of 32.3X (range: 5.06X – 65.77X, Table S1). When  
424 mapped to a reference containing both the phylogenetic markers and conotoxin genes, the %  
425 reads mapped to our targets was on average 14.86% (range: 0.7% - 38.07%, Table S1) and the  
426 average level of duplication was 47.47% (range: 22.89% - 89.06%, Table S1).

427 We found that genus had an impact on % mapped and % duplication, where non-*Conus*  
428 genera had lower % mapping and lower % duplication (Fig. S2). These differences likely  
429 occurred because conotoxin fragments were not easily recovered in these genera (ANOVA,  $p <$   
430 0.0001, Fig. S2). Genus did not have an impact on coverage or the number of phylogenetic  
431 markers recovered (ANOVA,  $p > 0.05$ , Fig. S2). We found that tissue quality, measured by the  
432 maximum fragment length visualized via gel electrophoresis, had a significant impact on the  
433 capture efficiency metrics (ANOVA,  $p < 0.0001$ , Fig. S3). DNA samples with strong genomic  
434 bands at the top of the gel tended to have higher % mapping, less % duplication, higher  
435 coverage, and a greater number of targets recovered (Fig. S3).

436 Our final conotoxin sequence dataset consists of exon fragments and we do not have  
437 information on exon coherence (which exons pair together on the same gene). We were unable to  
438 assemble full conotoxin genes because conotoxin introns are long (>1 kilobases, (Wu *et al.*  
439 2013)) and exceed the average insert size of our sequencing experiment (~350bp). We recovered  
440 fragments from all 58 gene superfamilies we targeted and obtained 159,670 sequences  
441 containing some or all of the mature toxin region (Table S3). Total conotoxin gene diversity per  
442 species (estimated by summing across all signal region exon fragments and sequences containing  
443 the entire coding region) ranged from 5 to 1280 copies in *Conus*, 31 to 88 copies in  
444 *Profundiconus*, and 7 to 164 in *Conasprella* (Table S1). Total conotoxin diversity was 311  
445 copies for *Californiconus californicus*, 12 copies for *Pygmaeconus tralli*, and 30 copies for the  
446 outgroup taxon, *Bathyoma sp* (Table S1). When compared to samples in (Phuong & Mahardika  
447 2017), the average change (increase or decrease) in total conotoxin gene diversity was ~90 gene  
448 copies (Table S4). If samples performed poorly in the number of phylogenetic markers  
449 recovered, conotoxin gene diversity estimates tended to be lower in this study than in (Phuong &  
450 Mahardika 2017) and vice versa (Fig. S4). The average absolute change in the number of  
451 fragments recovered per gene superfamily by region was 3.7 for sequences containing the signal  
452 region, 12.2 for the prepro region, 9.6 for the mature region, 48.9 for the post region, and 3.4 for  
453 sequences containing the entire coding region (Table S5, Fig. S5). We note several key outliers:  
454 the average absolute change in the number of fragments was 104.3 for the T gene superfamily  
455 containing the prepro region, 210.4 for the O1 gene superfamily prepro region, 57.4 for the O1  
456 gene superfamily mature region, 219.9 for the O2 gene superfamily mature region, and 1417 for  
457 the T gene superfamily post region (Table S5, Fig. S5).  
458

459 *Phylogeny*

460           The amount of missing data from the alignments was 15.4% when a minimum of 80% of  
461 the taxa were present in each locus, 26.8% when 50% of the taxa were present, and 38.6% when  
462 20% of the taxa were present. The number of loci retained in the alignment was 387 (107,011  
463 bp) when a minimum of 80% of the taxa were present in each locus, 976 (237,027 bp) when 50%  
464 of the taxa were present, and 1476 loci (336,557 bp) when 20% of the loci were present. Across  
465 all methods and datasets, we recovered phylogenies with a moderate level of resolution (average  
466 number of nodes resolved = 71.1%, range = 61.4 - 79.2%, Table S6). In general, as increased  
467 amounts of sequence data was given to the phylogenetic programs, more nodes became resolved  
468 (Table S6). While we recovered all 6 genera within Conidae with high confidence, relationships  
469 among subgenera were less supported (bootstrap and PP = 100%, Fig. 1, Fig. S6, S7, S8).

470

471 *Divergence time estimation*

472           We found evidence for three major branching events during the Eocene: (1) a branching  
473 event leading to *Profundiconus* (56.5 mya, CI = 46.3 – 65.3 mya, Fig. 1, S9), (2) a branching  
474 event leading to *Conus* (54.7 mya, CI = 42.5 – 63.6 mya, Fig. 1, S9), and (3) a branching event  
475 separating *Conasprella* and *Californiconus*, *Lilliconus*, and *Pygmaeconus* (46.0 mya, CI = 36.5 –  
476 53.2 mya, Fig. 1, S9). The branching event leading to *Californiconus* occurred during the  
477 Oligocene (26.1 mya, CI = 13.8 – 36.5 mya, Fig. 1, S9) and the split between *Lilliconus* and  
478 *Pygmaeconus* occurred during the Miocene (17.8 mya, CI = 9.25 – 25.1 mya, Fig. 1, S9).

479

480 *Diversification patterns*

481 We found that most branching events within each genus began to occur in the Miocene  
482 and continued until the present (Fig. 1). When analyzing the entire dataset, we found support for  
483 diversification rate heterogeneity, where BAMM identified at least one rate shift across Conidae  
484 (Fig. 1, S10). Across the 95% credible set of distinct shift configurations, BAMM detected an  
485 increase in diversification rates on the branch leading to *Lautoconus*, a clade consisting mainly  
486 of species endemic to the Cape Verde islands (Fig. 1, S10). However, when examining an  
487 artificially reduced dataset consisting of half the species within *Lautoconus*, we detect no rate  
488 shift or a decrease in diversification rates leading to the *Conus* clade (Fig. S11).

489

#### 490 *Trait dependent diversification*

491 Across all thresholds for the BiSSE analysis, we found that diversification rates were not  
492 influenced by conotoxin gene diversity. In all cases, the null model was either preferred (delta  
493 AIC > 2, Table S7) or was indistinguishable from a model where speciation and extinction were  
494 allowed to vary (delta AIC < 2, Table S7). Both the FiSSE and STRAPP analyses revealed that  
495 speciation rates were not correlated with conotoxin gene diversity ( $p > 0.05$ ). These results were  
496 consistent across both the full dataset and the reduced dataset.

497 We found that diversification rates were not dependent on diet when analyzing the full  
498 dataset (Table S8). However, in the reduced dataset, we found a signal for diet-dependent  
499 speciation rates (delta AIC > 2, Table S8). We found that species with mollusk-feeding diets had  
500 the fastest speciation rates (0.33), followed by piscivory (0.24), and vermivory (0.16). For the  
501 larval dispersal trait, we found support for trait-dependent speciation rates in the full dataset  
502 (delta AIC > 2, Table S9), where species with short-lived larvae had higher speciation rates (0.27

503 vs. 0.16). However, this result was not significant when examining the reduced dataset (Table  
504 S9).

505

506

## 507 **Discussion**

508

### 509 *Capture results*

510 Our targeted sequencing experiment underperformed initial testing of this sequencing  
511 method on cone snails (Phuong & Mahardika 2017). Although tissue quality impacted capture  
512 metrics (Fig. S3), the % of reads mapping to our targets for even our best samples was ~30%  
513 lower than expected (Phuong & Mahardika 2017). While it is difficult to determine the exact  
514 cause of this depression in our capture statistics, we hypothesized that changes made in the bait  
515 design between this study and (Phuong & Mahardika 2017) may have led to poorer capture  
516 results. For example, we recovered an overabundance of conotoxin sequences containing the post  
517 region from the T gene superfamily that has no clear co-variation pattern with phylogenetic  
518 relatedness (Fig. S12), which likely indicates a large amount of non-specific binding due to  
519 conotoxin misclassification. In the future, we suggest re-designing the baits to only include  
520 sequences from only the most critical regions (signal region and mature region) to avoid non-  
521 specific binding. Although overall capture efficiency statistics were low, the absolute change in  
522 conotoxin diversity estimates per gene superfamily was generally minor (Table S5). Therefore,  
523 we do not believe that total conotoxin diversity metrics were severely biased by the sequencing  
524 method.

525

526 *Phylogenetic relationships*

527 Below, we discuss the results of our phylogenetic analyses, how the phylogenetic  
528 relationships compare to past work, and their implications for Conidae taxonomy. Unless  
529 otherwise noted, the results we highlight below have at least 90% bootstrap support in the  
530 RAxML analyses and 90% posterior probabilities from the ASTRAL-II analyses (Figure S7, S8).  
531 When present results on subgeneric relationships starting from the top of the tree shown in  
532 Figure S6.

533 We recovered all six major deep lineages representing genera in Conidae that were  
534 previously described in recent molecular phylogenetic studies using mtDNA (Puillandre *et al.*  
535 2014a; Uribe *et al.* 2017), Fig. 1, S6, S7, S8). Specifically, we find strong support for  
536 *Profundiconus*, *Californiconus*, *Lilliconus*, *Pygmaeonus*, *Conasprella*, and *Conus*, as separate  
537 and distinct lineages. We also confirm the branching order of these six genera that were recently  
538 described using mtDNA genomes (Uribe *et al.* 2017), with *Profundiconus* being sister to all  
539 other genera, *Pygmaeonus* + *Lilliconus* sister to *Californiconus*, *Californiconus* + *Lilliconus* +  
540 *Pygmaeonus* sister to *Conasprella*, and these four genera sister to *Conus*.

541 Based on the molecular phylogeny from three mtDNA genes, monophyletic groupings of  
542 species from *Conasprella* were classified into several subgenera (Puillandre *et al.* 2014a; b). We  
543 note several differences between past results and our study in the relationships among these  
544 genera and their monophyly:

545 (1) *Ximeniconus* is sister to all other *Conasprella* in some trees, or we reconstructed a  
546 polytomy at the base of *Conasprella*, which contrasts with *Conasprella* (*Kohniconus*)  
547 *arcuata* recovered at the base of *Conasprella* in previous work (Puillandre *et al.* 2014a).



548 (2) *Kohniconus* is polyphyletic. In (Puillandre *et al.* 2014a), only a single species from  
549 *Kohniconus* was included and we find evidence for the non-monophyly of *Kohniconus*  
550 when we included the additional species, *C. centurio*. Given these results, we propose  
551 that *C. emarginatus*, *C. delSSERTII*, and *C. centurio* be placed in the subgenus *Kohniconus*  
552 and *C. arcuata* placed in a new subgenus.

553 (3) *Endemoconus* is paraphyletic. When including an additional species (*C. somalica*) not  
554 sequenced in (Puillandre *et al.* 2014a), we find that *Endemoconus* is not monophyletic.  
555 Based on these results, *C. somalica* should be transferred to *Conasprella*.

556 Within *Conus*, our results largely confirm previous findings that *C. distans* is sister to all other  
557 *Conus* species and the relationships among subgenera remain tenuous and difficult to resolve  
558 (Puillandre *et al.* 2014a). We note the following differences in subgenera relationships and  
559 classification between our results and past work:

560 (1) We found support the sister relationship between *Turriconus* and *Stephanoconus*, which  
561 has not been recovered in a previous study (Puillandre *et al.* 2014a).

562 (2) We found support for the monophyly of *Pyruconus* across our RAxML analyses, but not  
563 our ASTRAL-II analyses. The monophyly of *Pyruconus* was not supported in (Puillandre  
564 *et al.* 2014a).

565 (3) *C. trigonus* and *C. lozeti* were classified into the subgenus (*Plicaustraconus*) based on  
566 morphological characters (Jiménez-Tenorio & Tucker 2013; Puillandre *et al.* 2014b). We  
567 found this subgenus to be polyphyletic when sequence data was obtained.

568 (4) Similar to (Puillandre *et al.* 2014a), we found that *Textila* + *Afonsoconus* is sister to  
569 *Pionoconus*. However, instead of the unsupported relationship of *Asprella* as sister to  
570 these three subgenera, we found support for *Gastridium* as the sister group.

- 571 (5) We found support for the sister relationship between *Asprella* and *Phasmoconus*, which  
572 conflicts with the unsupported relationship shown (Puillandre *et al.* 2014a), where these  
573 subgenera branch in different parts of the phylogeny.
- 574 (6) We find support for the following successional branch order: *Tesselliconus*,  
575 *Plicaustraconus*, *Eugeniconus*, and *Conus*. We found that *Conus* is sister to *Leptoconus*,  
576 *Darioconus*, and *Cylinder*, but the relationships among these three subgenera remained  
577 unresolved. This conflicts with (Puillandre *et al.* 2014a) as *Cylinder* was paraphyletic,  
578 whereas in our results with increased sampling of *Eugeniconus*, *Cylinder* became  
579 monophyletic.
- 580 (7) We did not find strong support for the subgenus *Calibanus*, contrasting with previous  
581 work (Puillandre *et al.* 2014a). In our results, we found that *C. thalassiarchus* and *C.*  
582 *furvus* were not sister to each other, or their relationship resulted in an unresolved  
583 polytomy. Additional investigation into the subgeneric status of these two species.
- 584 (8) *C. sanderi* was classified into its own subgenus (*Sandericonus*) based on morphological  
585 characters (Jiménez-Tenorio & Tucker 2013; Puillandre *et al.* 2014b). Here, when  
586 sequence data were obtained, we found it nested within *Dauciconus*. Therefore, we  
587 synonymize *Sandericonus* with *Dauciconus* because *C. sanderi* is the type species for  
588 *Sandericonus*.
- 589 (9) *C. granulatus* was classified into its own subgenus (*Atlanticonus*) based on  
590 morphological characters (Jiménez-Tenorio & Tucker 2013; Puillandre *et al.* 2014b).  
591 Here, we found that it was nested within *Dauciconus*. No other species within this  
592 subgenus have been sequenced up until this point. Therefore, we synonymize  
593 *Atlanticonus* with *Dauciconus* because *C. granulatus* is the type species for *Atlanticonus*.

594 (10) Two species (*C. pergrandis* and *C. moncuri*) sequenced in this study were placed  
595 into the subgenus *Elisaconus* (Puillandre *et al.* 2014b). Our results do not support the  
596 monophyly of *Elisaconus*, as the sister relationship between *C. moncuri* and *C.*  
597 *pergrandis* was not supported in 5/6 trees. Additional data is required to classify *C.*  
598 *moncuri* and *C. pergrandis* into the appropriate subgenus.

599 (11) *C. cocceus* was placed into *Floraconus* based on morphological characters in  
600 (Puillandre *et al.* 2014b). With sequence data, we found that it was actually nested within  
601 *Phasmoconus*. Therefore, we transfer *C. cocceus* to the subgenus, *Phasmoconus*.

602  
603 Classification within Conidae is known to be highly unstable (Jiménez-Tenorio & Tucker 2013;  
604 Puillandre *et al.* 2014a; b; Puillandre & Tenorio 2018). Although the phylogeny presented here  
605 improved understanding of subgeneric relationships and monophyly of subgenera, resolving  
606 relationships within Conidae still remains a significant challenge. Given the underperformance of  
607 our capture experiment (Table S1), it is unclear if the reason for the moderate power in resolving  
608 relationships is due to insufficient data/incomplete data or due to short internal branches during  
609 the origination of Conidae subgenera that are extremely difficult to resolve. Overall, our results  
610 suggest that both additional data and increased sampling of Conidae species are reasonable  
611 pursuits to continue attempting to resolve the phylogeny and classification of this family of  
612 marine snails.

613  
614 *Timing of diversification*

615 The timing of splits between major are largely congruent with past estimates from a study  
616 using mtDNA genomes (Uribe *et al.* 2017), Fig. 1, S9). However, our age estimates for the

617 branching events between *Californiconus*, *Lilliconus*, and *Pygmaeconus* are much younger  
618 (occurring across the Oligocene into the Miocene) than previous estimates (occurring across the  
619 Eocene into the Oligocene, (Uribe *et al.* 2017), Fig. 1, S9). This discrepancy may have been  
620 caused by differences in fossil calibration, as we included many more fossils in this study  
621 compared to previous studies. The Conidae fossil record and analyses of several molecular  
622 phylogenetic studies suggest a major radiation of *Conus* during the Miocene (Kohn 1990; Duda  
623 Jr. *et al.* 2001; Uribe *et al.* 2017). While we noted that many branching events within *Conus*  
624 occurred during the Miocene into the present, we did not detect an increase in diversification on  
625 the branch leading to the origin of *Conus* (Fig. 1, S10, S11). This is congruent with  
626 diversification rates estimated from the fossil record (Kohn 1990), suggesting that the  
627 accumulation of species during the Miocene may have been a function of an increased number of  
628 lineages present rather than an increase in diversification rates. The number of species we  
629 included in the subgenus *Lautoconus* had an impact on the BAMM diversification analyses. On  
630 the full dataset, BAMM detected an increase in diversification rates leading to *Lautoconus* (Fig.  
631 1, S10), a known and documented radiation of cone snails (Duda & Rolán 2005; Cunha *et al.*  
632 2005). However, when we remove half the species in response to recent work suggesting  
633 taxonomic inflation in this subgenus (Abalde *et al.* 2017), we do not detect the same shift.  
634 Rather, there is partial support for no shift across Conidae, or a slight decrease in diversification  
635 rates leading to *Conus* (Fig. S11). These results suggest that the original diversification analyses  
636 and identified radiation of *Lautoconus* may have been due to taxonomic inaccuracies biasing  
637 the diversification analyses results, rather than a true radiation. What is even more striking about  
638 these results is that we found minimal diversification rate heterogeneity across Conidae, despite  
639 the expansive species richness across this group. It is unclear whether this signal is real, or due to

640 other technical artifacts. For sample, although we included over 300 species in this study, this  
641 only represents ~30% of the total diversity in this group and may have hindered our ability to  
642 effectively estimate diversification rates. Similarly, new Conidae species are continually  
643 described, with over 100 species described over the last few years (Worms Editorial Board  
644 2017). Therefore, our inability to estimate the number of living taxa may have weakened our  
645 ability to test the impact of diversification on this group.

646

#### 647 *Speciation rates and conotoxin gene diversity*

648 Contrary to macroevolutionary expectations, we were unable to detect any relationship  
649 between speciation rates and conotoxin gene diversity across all trait dependent diversification  
650 analyses (Fig. 1, S11, Table S7). Even when performing the analyses with BiSSE, a method in  
651 recent years that has become the subject of criticism due to high false positive rates (Abosky  
652 2017; Rabosky & Goldberg 2017), our analyses did not detect an impact of conotoxin gene  
653 diversity on diversification rates (Table S7). These results may have been expected, given that  
654 we found minimal levels of diversification rate heterogeneity in Conidae (at minimum, one shift,  
655 Fig. 1, S10, S11). As discussed previously, taxonomic instability in this group may have  
656 hindered our efforts to estimate past historical diversification patterns. However, we did find  
657 some signal for the impact of diet and larval dispersal strategy on diversification rates when  
658 using the BiSSE and MuSSE methods (Table S8, S9). Further work is needed to be fully  
659 confident in this signal given high false positive rates in these methods (Abosky 2017; Rabosky  
660 & Goldberg 2017) and given that our results depended on which dataset was used.

661 What is remarkable about these results is the lack of any signal on the impact of venom  
662 gene diversity on diversification rates in cone snails, even as we found some signal for trait-

663 dependent diversification in other Conidae characters. If this lack of signal is real, several  
664 biological factors may explain this decoupling between conotoxin gene diversity and speciation  
665 rates. A critical assumption in *Conus* biology is that ecological diversification driven by diet  
666 specialization is a major factor governing diversification dynamics in cone snails (Duda &  
667 Palumbi 1999; Duda Jr. *et al.* 2001). Past studies have shown that cone snail venom repertoires  
668 track their dietary breadth, providing a link between diet and venom evolution (Phuong *et al.*  
669 2016; Phuong & Mahardika 2017). However, it is unclear whether or not the relationship  
670 between diet and venom evolution leads to ecological speciation due to divergence in prey  
671 preference. Ecological speciation is often difficult to detect in marine ecosystems and long-term  
672 diversification patterns may be better explained by traits that limit dispersal and promote  
673 isolation (Bowen *et al.*). Another possibility is that conotoxin phenotypic divergence may not be  
674 the rate-limiting factor in prey specialization and divergence (Duda Jr. *et al.* 2001). Conotoxin  
675 genes are under continuous positive selection and gene duplication that allow venom components  
676 to change rapidly in response to the environment (Duda & Palumbi 1999; Duda Jr. *et al.* 2001;  
677 Chang & Duda 2012; Phuong & Mahardika 2017). This persistent evolutionary change in the  
678 venom cocktail suggests that perhaps venom evolution is not necessarily the factor limiting  
679 dietary shifts among species and ultimately, speciation among taxa. Ecological opportunity is  
680 hypothesized as a necessary component for diversification (Losos 2010) and may be a more  
681 critical factor limiting Conidae diversification. Indeed, evidence from the fossil record and past  
682 Conidae molecular phylogenetic studies indicate a concentration of lineage formation during the  
683 Miocene (Kohn 1990; Duda Jr. *et al.* 2001; Uribe *et al.* 2017), a period that is coincident with the  
684 formation of coral reefs in the Indo-Australian Archipelago (Cowman & Bellwood 2011). Our  
685 results also show a concentration of branching events during this period as well, though we do

686 not detect a shift in diversification rates (Fig. 1, S10, S11). Overall, our results point to increased  
687 taxonomic sampling and a holistic approach to investigating factors shaping diversification in  
688 Conidae for future work.

689         Venom evolution is assumed to be a key innovation that led to the evolutionary success  
690 of venomous animal lineages (Pyron & Burbrink 2011; Sunagar *et al.* 2016) and a large body of  
691 work is devoted towards understanding how venom evolves and responds to the environment  
692 over time (Kordis & Gubensek 2000; Wong & Belov 2012; Casewell *et al.* 2013). However, the  
693 impact of venom evolution on higher-level diversification patterns is rarely tested. Here, we  
694 examined the effect of variation in the adaptive capacity of venom across Conidae species and  
695 found it had no influence on macroevolutionary diversification patterns. Although we do not  
696 detect a strong signal of conotoxin gene diversity shaping speciation rates in Conidae, it does not  
697 refute the importance of venom evolution in adaptation and prey specialization as venom may be  
698 necessary, but not sufficient, to promote speciation (Duda *et al.* 2009; Safavi-Hemami *et al.*  
699 2015; Chang & Duda 2016; Phuong *et al.* 2016; Phuong & Mahardika 2018). Future work in  
700 other venomous animal systems may shed light on whether or not the ability to adapt to different  
701 prey through venom evolution translates to the long-term evolutionary success of taxa.

702

### 703 **Data availability**

704 Raw read data will be made available at the National Center for Biotechnology Information  
705 Sequence Read Archive. Bait sequences, conotoxin sequences, scripts, and final datasets used for  
706 analyses will be uploaded onto Dryad following publication.

707

### 708 **Acknowledgements**

709 A majority of the sampling material in this paper originates from numerous shore-based  
710 expeditions and deep sea cruises, conducted respectively by MNHN and Pro-Natura International  
711 (PNI) as part of the Our Planet Reviewed programme (SANTO 2006, ATIMO VATAE,  
712 MAINBAZA, INHACA 2011, GUYANE 2014, PAPUA NIUGINI, KAVIENG 2014), by  
713 MNHN and AAMP (Pakaihi i Te Moana), and/or by MNHN and Institut de Recherche pour le  
714 Développement (IRD) as part of the Tropical Deep-Sea Benthos programme (AURORA 2007,  
715 BIOPAPUA, EBISCO, EXBODI, MADEEP, MIRIKY, TAIWAN 2013, NANHAI 2014,  
716 BIOPAPUA, SALOMONBOA 3, CONCALIS, EXBODI, SALOMON BOA3,  
717 KARUBENTHOS 2015, NORFOLK 2, TERRASSES). Scientific partners included the  
718 University of Papua New Guinea (UPNG); National Fisheries College, Kavieng; Institut  
719 d'Halieutique et Sciences Marines (IH.SM), Université de Tuléar, Madagascar; Universidade  
720 Eduardo Mondlane, Maputo; the Madagascar bureau of the Wildlife Conservation Society  
721 (WCS); and Instituto Español de Oceanografía (IOE). Funders and sponsors included the Total  
722 Foundation, Prince Albert II of Monaco Foundation, Stavros Niarchos Foundation, Richard  
723 Lounsbery Foundation, Vinci Entrepouse Contracting, Fondation EDF, European Regional  
724 Development Fund (ERDF), the Philippines Bureau of Fisheries and Aquatic Research (BFAR),  
725 the French Ministry of Foreign Affairs, Fonds Pacifique and the Government of New Caledonia.  
726 Additional field work included PANGLAO 2004 and PANGLAO 2005 (joint projects of MNHN  
727 and University of San Carlos, Cebu City, and the Philippines Bureau of Fisheries and Aquatic  
728 Research); KARUBENTHOS 2012 (a joint project of MNHN with Parc National de la  
729 Guadeloupe and Université des Antilles); sampling in Western Australia arranged by Hugh  
730 Morrison, with support of the Western Australian Museum. The Taiwan and South China Sea  
731 cruises were supported by bilateral cooperation research funding from the Taiwan Ministry of



732 Science and Technology (MOST 102-2923-B-002-001-MY3, PI Wei-Jen Chen) and the French  
733 National Research Agency (ANR 12-ISV7-0005-01, PI Sarah Samadi). All expeditions operated  
734 under the regulations then in force in the countries in question and satisfy the conditions set by  
735 the Nagoya Protocol for access to genetic resources. We thank the Indonesian Ministry of State  
736 for Research and Technology (RISTEK) for providing permission to MAP and GNM to conduct  
737 fieldwork Bali in 2014 (permit number 277/SIP/FRP/SM/VIII/ 2013) and providing permission  
738 to PWHV TvR RMM and REP to conduct fieldwork across Indonesia in 2016 (permit number  
739 XXXXXXXXXXXX). We thank DST Hariyanto, MBAP Putra, MKAA Putra, and the staff at the  
740 Indonesian Biodiversity Research Center in Denpasar, Bali for assistance during the 2014 field  
741 season; the staff at the Museum Zoologicum Bogoriense for assistance during the 2016 field  
742 season; F Criscione, F Köhler, A Moussalli, A Hogget, and L Vail for logistical assistance for  
743 fieldwork at the Lizard Island Research Station in Australia; M Reed, A Hallan, and J  
744 Waterhouse for access to specimens at the Australian Museum in Sydney, Australia; J Finn, M  
745 Mackenzie, and M Winterhoff for access to specimens at the Museum Victoria in Melbourne,  
746 Australia; G Pauley and AM Bemis for access to specimens at the Florida Museum of Natural  
747 History at the University of Florida; TF Duda Jr. and T Lee for access to specimens at the  
748 University of Michigan Museum of Zoology; L Kirkendale and C Whisson for access to  
749 specimens at the Western Australian Museum in Perth, Australia; WF Gilly for access to the *C.*  
750 *californicus* specimen; H Safavi-Hemami and Q Li for access to 10 additional Conidiae  
751 transcriptomes; K Bi for advice on bait design; A Devault and MYcroarray for great service and  
752 technical support for bait synthesis; L Smith and the Evolutionary Genetics Lab at UC Berkeley  
753 for laboratory support; J Chang, MCW Lim and EM McCartney-Melstad for thoughtful advice  
754 and discussions throughout the entire process; E Monnier for collating information on Conidiae

755 larval dispersal strategies and MJ Tenorio for verifying Conidae diets and identifications. This  
756 work used the Extreme Science and Engineering Discovery Environment (XSEDE), which is  
757 supported by National Science Foundation grant number ACI-1053575. This work was  
758 supported by two Grants-in-Aid of research from Sigma Xi, a Grants-in-Aid of Research from  
759 the Society for Integrative and Comparative Biology, a research grant from the Society of  
760 Systematic Biologists, a Student Research Award from the American Society of Naturalists, a  
761 National Science Foundation Graduate Research Opportunities Worldwide to Australia, the  
762 Lerner Gray Fund for Marine Research from the American Museum of Natural History, research  
763 grants from the Department of Ecology and Evolutionary Biology at UCLA, the Melbourne R.  
764 Carriker Student Research Award from the American Malacological Society, an Academic Grant  
765 from the Conchologists of America, a Student Research Award from Unitas Malacologicas, a  
766 Lemelson Fellowship from the UCLA Indonesian Studies program, the Lewis and Clark Fund  
767 from the American Philosophical Society, a Young Explorer's Grant from the National  
768 Geographic Society, a Travel Award from the UCLA Graduate Division, a Research Grant from  
769 the American Institute for Indonesian Studies and the Council of American Overseas Research  
770 Centers, a small award from the B Shaffer Lab, a National Science Foundation Graduate  
771 Research Fellowship, an Edwin W. Pauley fellowship, a Fulbright Fellowship to Indonesia, and a  
772 Chateaubriand fellowship awarded to MAP. This work was supported by the Service de  
773 Systématique Moléculaire (UMS 2700 CNRS-MNHN) and the CONOTAX project funded by  
774 the French National Research Agency (grant number ANR-13-JSV7-0013-01). This work used  
775 the Vincent J. Coates Genomics Sequencing Laboratory at UC Berkeley, supported by NIH S10  
776 OD018174 Instrumentation Grant. The *C. californicus* specimen was collected under a  
777 California Department of Fish and Wildlife collecting permit granted to WF Gilly (SC-6426).

778

779 **Figure 1.** Time calibrated maximum likelihood phylogeny of the cone snails. Phylogeny was  
780 estimated in RAxML using a concatenated alignment of loci and was calibrated using 13 fossils  
781 placed at nodes throughout the tree. Only loci with at least 20% of the taxa present were included  
782 in the alignment. Colors across the phylogeny show instantaneous diversification rates and are  
783 averaged across all rate models sampled from a BAMM analysis. Warmer colors indicate higher  
784 speciation rates. Log-lineage through time plot is shown below the phylogeny. First four  
785 columns shown next to tip represent the following from left to right: presence of vermivory  
786 (blue), presence of molluscivory (blue), presence of piscivory (blue), larval type (planktotrophy:  
787 light gray, lecithotrophy, blue), and missing data is represented as dark gray. Bars are shown at  
788 tips depicting variation conotoxin gene diversity across the phylogeny. If bar is not shown, data  
789 is not available or were excluded from downstream diversification analyses. Histogram on the  
790 bottom right shows variation in conotoxin gene diversity. Abbreviations: Plio. = Pliocene; Pleis.  
791 = Pleistocene.

792 **Table S1.** Sample information and capture efficiency metrics. We first list the species name  
793 listed in all phylogenetic analyses (“species”) and the accepted taxonomic classification in the  
794 WoRMS database at the genus, subgenus, and species level (“WoRMS genus”, “WoRMS  
795 subgenus”, “WoRMS species”). We then list the specimen ID (“ID”), the collection source  
796 (“Collection”), the year the sample was collected (“Year Collected”), how the sample was  
797 preserved (“Preservation type”), and the country the sample originated from (“Country”). We  
798 then list “Gelsize”, or the largest fragment size visualized via gel electrophoresis as a way to  
799 measure tissue quality. Values can be either “g” for genomic band, or 1500, 1000, or 500 for  
800 bands beginning at 1500bp, 1000bp, or 500bp. We list the data collection method (“Data

801 collection method”), the number of reads sequenced (“# of reads sequenced”) and several capture  
802 efficiency metrics. Finally, we list the total estimated number of conotoxin genes per species  
803 (“Conotoxin gene diversity”).

804

805 **Table S2.** Information on fossils used for calibration. We list the fossil taxon (“Fossil Species”),  
806 the genus (“Clade assignment”), extant species related to the fossil (“Compared with”), the  
807 formation (“Formation”), the age of the fossil (“Age”), and its citation (“Reference”).

808

809 **Table S3.** Table showing the number of conotoxin sequences recovered per species for each  
810 gene superfamily. Within each gene superfamily, conotoxin sequences were categorized based  
811 on whether they contained the entire coding region or mostly the signal, prepro, mature, or post  
812 regions.

813

814 **Table S4.** Comparison of conotoxin gene diversity estimates between this study and (Phuong &  
815 Mahardika 2017). These represent comparisons between technical replicates (capture experiment  
816 was performed on the same libraries in both studies).

817

818 **Table S5.** Comparison of conotoxin gene diversity estimates between this and (Phuong &  
819 Mahardika 2017), broken down by gene superfamily. Within each gene superfamily, conotoxin  
820 sequences were categorized based on whether they contained the entire coding region or mostly  
821 the signal, prepro, mature, or post regions. These represent comparisons between technical  
822 replicates (capture experiment was performed on the same libraries in both studies).

823

824 **Table S6.** Number of nodes resolved depending on the amount of missing data and the tree  
825 inference method. Phylogenetic trees were inferred using either RAxML or ASTRAL-II. The “%  
826 taxa per locus was” the percent of samples needed per locus in order to retain the locus for  
827 phylogenetic inference.

828

829 **Table S7.** Venom gene diversity BiSSE AIC results. “Dataset” represents whether the full  
830 dataset was used or the reduced dataset. “Threshold” represents the conotoxin gene diversity  
831 value used to decide between “high” and “low” conotoxin diversity. Values above the threshold  
832 value were categorized as “high” and values below were categorized as “low”. “AIC – variable  
833 rates” shows AIC values for a model where speciation and extinction rates were allowed to vary  
834 depending on a trait. “AIC – equal rates” represents AIC values for the null model, where rates  
835 were not allowed to vary by trait.

836

837 **Table S8.** Diet BiSSE AIC results. Model values were generated under a variable rates model  
838 (where speciation was allowed to vary) or under an equal rates model (speciation rates across  
839 trait states were equal).

840

841 **Table S9.** Larval dispersal type BiSSE AIC results. Model values were generated under a  
842 variable rates model (where speciation was allowed to vary) or under an equal rates model  
843 (speciation rates across trait states were equal).

844

845 **Figure S1.** Node placement of fossils. Numbers correspond to node placement justification in  
846 the supplementary information on node assignment. Tree was generated from a RAxML analysis

847 of a concatenated alignment where loci were kept if at least 20% of species was present in the  
848 locus. Best tree is shown and erroneous and intraspecific tips were pruned.

849

850 **Figure S2.** Boxplots showing impact of phylogeny (categorized by Conidae genus) on capture  
851 efficiency metrics. Graph title shows resultant P value from ANOVA analyses.

852

853 **Figure S3.** Boxplots showing impact of tissue quality (estimated by maximum DNA fragment  
854 lengths assessed via gel electrophoresis) on capture efficiency metrics. Categories are either “g”  
855 for genomic band, or 1500, 1000, or 500 for bands beginning at 1500bp, 1000bp, or 500bp.  
856 Graph title shows resultant P value from ANOVA analyses.

857

858 **Figure S4.** Scatterplot showing relationship between the number of phylogenetic markers  
859 recovered and the change in total conotoxin gene diversity between this study and (Phuong &  
860 Mahardika 2017). Results showed a positive relationship between the two parameters, suggesting  
861 that if a sample performed poorly in the capture experiment, it performed poorly in recovering  
862 data across all loci (phylogenetic loci or conotoxin loci).

863

864 **Figure S5.** Histograms showing absolute change in conotoxin sequence diversity per gene  
865 superfamily between this study and (Phuong & Mahardika 2017). Graphs are partitioned by  
866 conotoxin functional region, where sequences were categorized based on whether they contained  
867 the entire coding region or mostly the signal, prepro, mature, or post regions. On average,  
868 estimates of conotoxin diversity per gene superfamily varied slightly.

869

870 **Figure S6.** Maximum likelihood phylogeny inferred using RAxML, where 20% of the taxa  
871 needed to be present within a locus to be included in the final concatenated alignment. The six  
872 major genera are colored and subgenera re noted for *Conasprella* and *Conus*.

873

874 **Figure S7.** Phylogenies inferred through the coalescent-based method, ASTRAL-II. Individual  
875 loci were inferred under default parameters in RAxML. Nodes are collapsed when posterior  
876 probabilities are <90%. Trees are colored and labeled by genus. We varied the level of missing  
877 data for each ASTRAL run, where we only retained loci if (a) 80% of taxa had sequences, (b)  
878 50% had sequences, and (c) 20% of taxa had sequences.

879

880 **Figure S8.** Maximum likelihood phylogenies generated using a concatenated alignment. Nodes  
881 are collapsed when bootstrap support values are <90%. Trees are colored and labeled by genus.  
882 We varied the level of missing data for each RAxML run, where we only retained loci for the final  
883 concatenated alignment if (a) 80% of taxa had sequences, (b) 50% had sequences, and (c) 20% of  
884 taxa had sequences.

885

886 **Figure S9.** Maximum likelihood phylogeny dated with 13 fossil node calibrations in MCMCtree.  
887 95% confidence intervals shown at nodes. The final concatenated alignment consisted of loci  
888 where 20% of the taxa needed to be present within the locus to be included.

889

890 **Figure S10.** 95% credible set of distinct shift configurations from BAMM for the full dataset.  
891 Each graph is labeled by the posterior probability of each shift configuration. Warmer, red colors

892 represent faster speciation rates than cooler, blue colors. We note that in all shift configurations,  
893 there is a shift in diversification rates in the clade leading to *Lautoconus*.

894

895 **Figure S11.** 95% credible set of distinct shift configurations from BAMM for the reduced  
896 dataset. Each graph is labeled by the posterior probability of each shift configuration. Warmer,  
897 red colors represent faster speciation rates than cooler, blue colors. We note that in all shift  
898 configurations, there is a shift in diversification rates in the clade leading to *Lautoconus*.

899

900 **Figure S12.** Diversity estimates for the A gene superfamily signal region and the T gene  
901 superfamily post region. Estimates are plotted next to the RAxML phylogeny where 20% of taxa  
902 had sequences in each locus.

903

904 Abalde S, Tenorio MJ, Afonso CML *et al.* (2017) Phylogenetic relationships of cone snails  
905 endemic to Cabo Verde based on mitochondrial genomes. , 1–19.

906 Abosky DALR (2017) Model Inadequacy and Mistaken Inferences of Trait-Dependent  
907 Speciation. , **64**, 340–355.

908 Ashkenazy H, Penn O, Doron-faigenboim A *et al.* (2012) FastML : a web server for probabilistic  
909 reconstruction of ancestral sequences. , **40**, 580–584.

910 Benson G (1999) Tandem Repeats Finder: a program to analyse DNA sequences. *Nucleic Acids*  
911 *Res.*, **27**, 573–578.

912 Bi K, Vanderpool D, Singhal S *et al.* (2012) Transcriptome-based exon capture enables highly  
913 cost-effective comparative genomic data collection at moderate evolutionary scales. *BMC*  
914 *Genomics*, **13**, 403.



- 915 Bowen BW, Rocha LA, Toonen RJ, Karl SA The origins of tropical marine biodiversity.
- 916 Casewell NR, Wüster W, Vonk FJ, Harrison RA, Fry BG (2013) Complex cocktails: the  
917 evolutionary novelty of venoms. *Trends in ecology & evolution*, **28**, 219–29.
- 918 Chang D, Duda TF (2012) Extensive and continuous duplication facilitates rapid evolution and  
919 diversification of gene families. *Molecular biology and evolution*, **29**, 2019–29.
- 920 Chang D, Duda TF (2016) Age-related association of venom gene expression and diet of  
921 predatory gastropods. *BMC Evolutionary Biology*, **16**, 27.
- 922 Cowman PF, Bellwood DR (2011) Coral reefs as drivers of cladogenesis: expanding coral reefs,  
923 cryptic extinction events, and the development of biodiversity hotspots. *Journal of*  
924 *evolutionary biology*, **24**, 2543–2562.
- 925 Crow KD, Wagner GP (2006) What is the role of genome duplication in the evolution of  
926 complexity and diversity? *Molecular biology and evolution*, **23**, 887–92.
- 927 Cunha RL, Castilho R, Rüber L, Zardoya R (2005) Patterns of cladogenesis in the venomous  
928 marine gastropod genus *Conus* from the Cape Verde islands. *Systematic biology*, **54**, 634–  
929 50.
- 930 Duda TF, Chang D, Lewis BD, Lee T (2009) Geographic variation in venom allelic composition  
931 and diets of the widespread predatory marine gastropod *Conus ebraeus*. *PloS one*, **4**, e6245.
- 932 Duda Jr. TF, Kohn AJ, Palumbi SR (2001) Origins of diverse feeding ecologies within *Conus*, a  
933 genus of venomous marine gastropods. *Biological Journal of the Linnean Society*, **73**, 391–  
934 409.
- 935 Duda TF, Palumbi SR (1999) Molecular genetics of ecological diversification: duplication and  
936 rapid evolution of toxin genes of the venomous gastropod *Conus*. *Proceedings of the*  
937 *National Academy of Sciences of the United States of America*, **96**, 6820–3.

- 938 Duda TF, Palumbi SR (2000) Evolutionary diversification of multigene families: allelic selection  
939 of toxins in predatory cone snails. *Molecular biology and evolution*, **17**, 1286–93.
- 940 Duda TF, Rolán E (2005) Explosive radiation of Cape Verde *Conus*, a marine species flock.  
941 *Molecular ecology*, **14**, 267–72.
- 942 FitzJohn RG (2012) Diversitree : comparative phylogenetic analyses of diversification in R.  
943 *Methods in Ecology and Evolution*, **3**, 1084–1092.
- 944 Folmer O, Black M, Hoeh W, Lutz R, Vrijenhoek R (1994) DNA primers for amplification of  
945 mitochondrial cytochrome c oxidase subunit I from diverse metazoan invertebrates.  
946 *Molecular marine biology and biotechnology*, **3**, 294–9.
- 947 Grabherr MG, Haas BJ, Yassour M *et al.* (2011) Full-length transcriptome assembly from RNA-  
948 Seq data without a reference genome. *Nature biotechnology*, **29**, 644–52.
- 949 Hendricks JR (2009) *The Genus Conus (Mollusca:Neogastropoda) in the Plio-Pleistocene of the*  
950 *Southeastern United States*. Paleontological Research Institution, Ithaca, NY.
- 951 Hendricks JR (2015) Glowing Seashells : Diversity of Fossilized Coloration Patterns on Coral  
952 Reef-Associated Cone Snail (Gastropoda : Conidae) Shells from the Neogene of the  
953 Dominican Republic. *Plos One*, **10**, 1–59.
- 954 Hendricks JR (2018) Diversity and preserved shell coloration patterns of Miocene Conidae  
955 (Neogastropoda) from an exposure of the Gatun Formation, Colón Province, Panama.  
956 *Journal of Paleontology*, **In press**.
- 957 Hoekstra HE, Coyne JA (2007) The Locus of Evolution: Evo Devo and the Genetics of  
958 Adaptation. *Evolution*, **61**, 995–1016.
- 959 Huang X, Madan A (1999) CAP3: A DNA sequence assembly program. *Genome Research*, **9**,  
960 868–877.

- 961 Jablonski D (1986) Larval ecology and macroevolution in marine invertebrates. *Bulletin of*  
962 *Marie Science*, **39**, 565–587.
- 963 Jiménez-Tenorio M, Tucker JK (2013) *Illustrated catalog of the Living Cone snails*. MdM  
964 Publishing, Wellington, FL.
- 965 Jones AG, Arnold SJ, Bürger R (2007) The mutation matrix and the evolution of evolvability.  
966 *Evolution*, **61**, 727–45.
- 967 Kaas Q, Westermann J-C, Craik DJ (2010) Conopeptide characterization and classifications: an  
968 analysis using ConoServer. *Toxicon*, **55**, 1491–509.
- 969 Kaas Q, Yu R, Jin A-H, Dutertre S, Craik DJ (2012) ConoServer: updated content, knowledge,  
970 and discovery tools in the conopeptide database. *Nucleic acids research*, **40**, D325-30.
- 971 Katoh K, Kuma K-I, Toh H, Miyata T (2005) MAFFT version 5: Improvement in accuracy of  
972 multiple sequence alignment. *Nucleic Acids Research*, **33**, 511–518.
- 973 Kohn AJ (1990) Tempo and mode of evolution in conidae. *Malacologia*, **32**, 55–67.
- 974 Kohn AJ (2001) Maximal species richness in *Conus*: diversity, diet and habitat on reefs of  
975 northeast Papua New Guinea. *Coral Reefs*, **20**, 25–38.
- 976 Kordis D, Gubensek F (2000) Adaptive evolution of animal toxin multigene families. *Gene*, **261**,  
977 43–52.
- 978 Langmead B, Salzberg SL (2012) Fast gapped-read alignment with Bowtie 2. *Nature methods*, **9**,  
979 357–9.
- 980 Lavergne V, Harliwong I, Jones A *et al.* (2015) Optimized deep-targeted proteotranscriptomic  
981 profiling reveals unexplored *Conus* toxin diversity and novel cysteine frameworks.  
982 *Proceedings of the National Academy of Sciences*, **112**.
- 983 Li W, Godzik A (2006) Cd-hit: a fast program for clustering and comparing large sets of protein

- 984 or nucleotide sequences. *Bioinformatics*, **22**, 1658–9.
- 985 Li H, Handsaker B, Wysoker A *et al.* (2009) The Sequence Alignment/Map format and  
986 SAMtools. *Bioinformatics*, **25**, 2078–9.
- 987 Losos JB (2010) Adaptive radiation, ecological opportunity, and evolutionary determinism. *The*  
988 *American naturalist*, **175**, 623–639.
- 989 Maddison WP, Midford PE, Otto SP (2007) Estimating a binary character’s effect on speciation  
990 and extinction. *Systematic biology*, **56**, 701–10.
- 991 Magoč T, Salzberg SL (2011) FLASH: fast length adjustment of short reads to improve genome  
992 assemblies. *Bioinformatics*, **27**, 2957–63.
- 993 Malmstrøm M, Matschiner M, Tørresen OK *et al.* (2016) Evolution of the immune system  
994 influences speciation rates in teleost fishes. *Nature Genetics*, **48**.
- 995 Mayrose I, Zhan SH, Rothfels CJ *et al.* (2011) Recently Formed Polyploid Plants Diversify at  
996 Lower Rates. , **333**.
- 997 Meyer M, Kircher M (2010) Illumina sequencing library preparation for highly multiplexed  
998 target capture and sequencing. *Cold Spring Harbor protocols*, **2010**,  
999 doi:10.1101/pdb.prot5448.
- 1000 Mirarab S, Warnow T (2015) ASTRAL-II : coalescent-based species tree estimation with many  
1001 hundreds of taxa and thousands of genes. *Bioinformatics*, **45**, 44–52.
- 1002 Paradis E, Claude J, Strimmer K (2018) APE : Analyses of Phylogenetics and Evolution in R  
1003 language. , **20**, 289–290.
- 1004 Phuong M, Mahardika G (2017) Targeted sequencing of venom genes from cone snail genomes  
1005 reveals coupling between dietary breadth and venom diversity. *bioRxiv*.
- 1006 Phuong MA, Mahardika GN (2018) Targeted Sequencing of Venom Genes from Cone Snail

- 1007 Genomes Improves Understanding of Conotoxin Molecular Evolution. , 1–15.
- 1008 Phuong MA, Mahardika GN, Alfaro ME (2016) Dietary breadth is positively correlated with  
1009 venom complexity in cone snails. *BMC Genomics*, **17**, 401.
- 1010 Pigliucci M (2008) Is evolvability evolvable? *Nature reviews. Genetics*, **9**, 75–82.
- 1011 Puillandre N, Bouchet P, Duda TF *et al.* (2014a) Molecular phylogeny and evolution of the cone  
1012 snails (Gastropoda, Conoidea). *Molecular phylogenetics and evolution*, **78**, 290–303.
- 1013 Puillandre N, Duda TF, Meyer C, Olivera BM, Bouchet P (2014b) One, four or 100 genera? A  
1014 new classification of the cone snails. *Journal of Molluscan Studies*, 1–23.
- 1015 Puillandre N, Kantor YI, Sysoev a. *et al.* (2011) The dragon tamed? A molecular phylogeny of  
1016 the Conoidea (Gastropoda). *Journal of Molluscan Studies*, **77**, 259–272.
- 1017 Puillandre N, Tenorio MJ (2018) *Molluscan Studies*. , 200–210.
- 1018 Pyron RA, Burbrink FT (2011) EXTINCTION , ECOLOGICAL OPPORTUNITY , AND THE  
1019 ORIGINS OF GLOBAL SNAKE DIVERSITY. , 163–178.
- 1020 Rabosky DL (2014) Automatic detection of key innovations, rate shifts, and diversity-  
1021 dependence on phylogenetic trees. *PloS one*, **9**, e89543.
- 1022 Rabosky DL, Goldberg EE (2017) FiSSE : A simple nonparametric test for the effects of a binary  
1023 character on lineage diversification rates. , 1432–1442.
- 1024 Rabosky DL, Grundler M, Anderson C *et al.* (2014) BAMMtools : an R package for the analysis  
1025 of evolutionary dynamics on phylogenetic trees. , 701–707.
- 1026 Rabosky DL, Huang H (2016) A Robust Semi-Parametric Test for Detecting Trait-Dependent  
1027 Diversification. *Systematic biology*, **65**, 181–193.
- 1028 Rabosky DL, Santini F, Eastman J *et al.* (2013) Rates of speciation and morphological evolution  
1029 are correlated across the largest vertebrate radiation. *Nature communications*, **4**, 1–8.

- 1030 Robertson FM, Gundappa MK, Grammes F *et al.* (2017) Lineage-specific rediploidization is a  
1031 mechanism to explain time-lags between genome duplication and evolutionary  
1032 diversification. , 1–14.
- 1033 Ruby JG, Bellare P, Derisi JL (2013) PRICE: software for the targeted assembly of components  
1034 of (Meta) genomic sequence data. *G3*, **3**, 865–80.
- 1035 Safavi-Hemami H, Gajewiak J, Karanth S *et al.* (2015) Specialized insulin is used for chemical  
1036 warfare by fish-hunting cone snails. *Proceedings of the National Academy of Sciences*, **112**,  
1037 1743–1748.
- 1038 Santini F, Harmon LJ, Carnevale G, Alfaro ME (2009) Did genome duplication drive the origin  
1039 of teleosts? A comparative study of diversification in ray-finned fishes. *BMC evolutionary*  
1040 *biology*, **9**, 194.
- 1041 Sayyari E, Mirarab S (2017) Fast Coalescent-Based Computation of Local Branch Support from  
1042 Quartet Frequencies Article Fast Track. , **33**, 1654–1668.
- 1043 Schmieder R, Edwards R (2011) Quality control and preprocessing of metagenomic datasets.  
1044 *Bioinformatics*, **27**, 863–864.
- 1045 Simakov O, Marletaz F, Cho S-J *et al.* (2013) Insights into bilaterian evolution from three  
1046 spiralian genomes. *Nature*, **493**, 526–31.
- 1047 Slater GSC, Birney E (2005) Automated generation of heuristics for biological sequence  
1048 comparison. *BMC bioinformatics*, **6**, 31.
- 1049 Smit AFA, Hubley R, Green P (2015) RepeatMasker Open-4.0.
- 1050 Soltis DE, Albert V a, Leebens-Mack J *et al.* (2009) Polyploidy and angiosperm diversification.  
1051 *American journal of botany*, **96**, 336–48.
- 1052 Stamatakis A (2006) RAxML-VI-HPC: Maximum likelihood-based phylogenetic analyses with

- 1053 thousands of taxa and mixed models. *Bioinformatics*, **22**, 2688–2690.
- 1054 Sunagar K, Casewell NR, Varma S *et al.* (2016) Deadly Innovations: Unraveling the Molecular  
1055 Evolution of Animal Venoms. , 1–27.
- 1056 Tank DC, Eastman JM, Pennell MW *et al.* (2015) Nested radiations and the pulse of angiosperm  
1057 diversification : increased diversification rates often follow whole genome duplications.
- 1058 Uribe JE, Puillandre N, Zardoya R (2017) Phylogenetic relationships of Conidae based on  
1059 complete mitochondrial genomes. *Molecular Phylogenetics and Evolution*, **107**, 142–151.
- 1060 Wagner GP, Altenberg L (1996) Perspective: Complex Adaptations and the Evolution of  
1061 Evolvability. *Evolution*, **50**, 967–976.
- 1062 Wong ESW, Belov K (2012) Venom evolution through gene duplications. *Gene*, **496**, 1–7.
- 1063 Worms Editorial Board (2017) World Register of Marine Species.
- 1064 Wu Y, Wang L, Zhou M *et al.* (2013) Molecular evolution and diversity of *Conus* peptide toxins,  
1065 as revealed by gene structure and intron sequence analyses. *PloS one*, **8**, e82495.
- 1066 Yang AS (2001) Modularity, evolvability, and adaptive radiations: a comparison of the hemi-  
1067 and holometabolous insects. *Evolution & development*, **3**, 59–72.
- 1068 Yang Z (2007) PAML 4: phylogenetic analysis by maximum likelihood. *Molecular biology and*  
1069 *evolution*, **24**, 1586–91.
- 1070 Zhan SH, Glick L, Tsigenopoulos CS, Otto SP, Mayrose I (2014) Comparative analysis reveals  
1071 that polyploidy does not decelerate diversification in fish. , **27**, 391–403.
- 1072

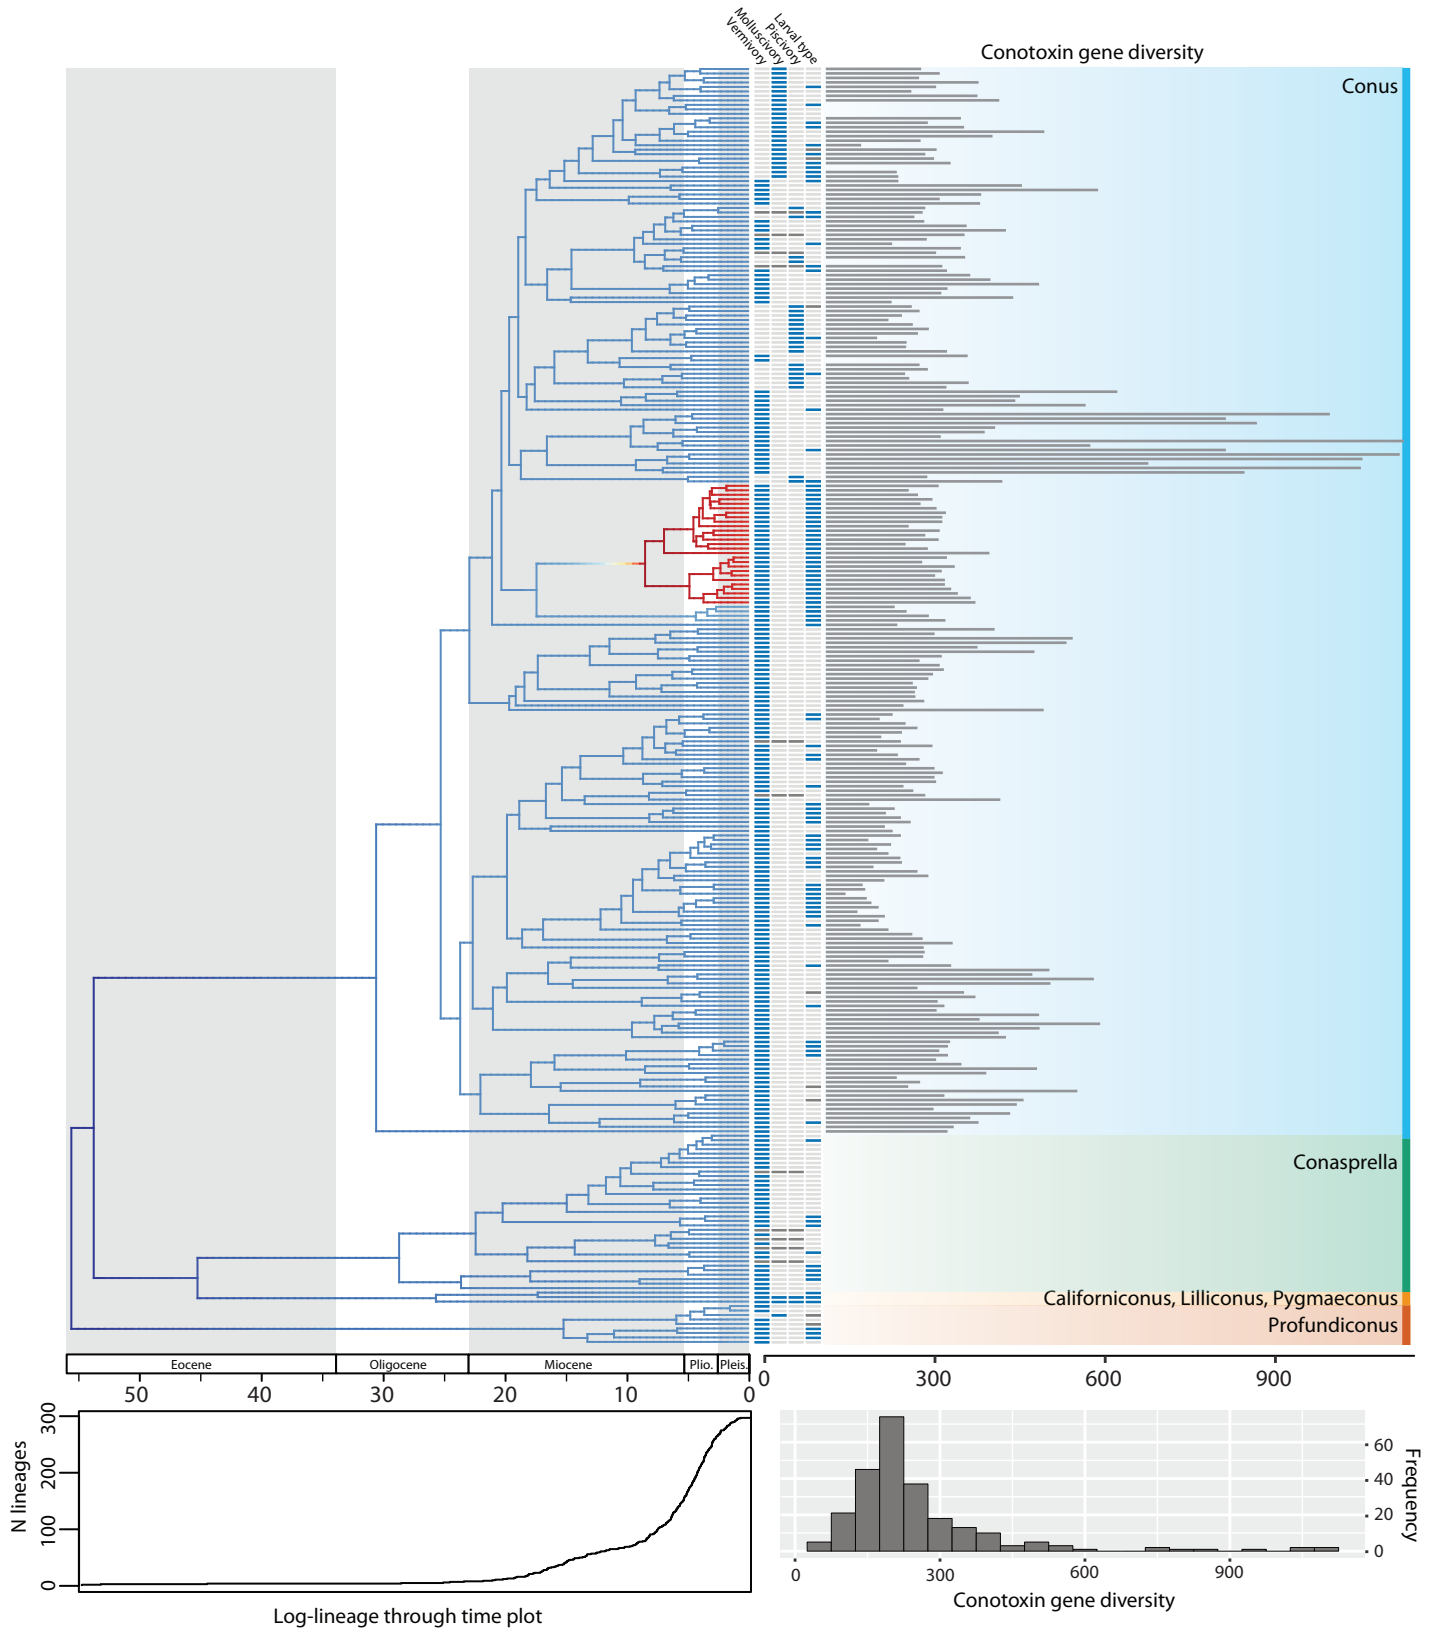

Source: http://biorxiv.org/content/10.1101/359976v1.full.pdf
